# Supplementary material for: Nucleoporin 160 Regulates Flowering through Anchoring HOS1 for Destabilizing CO in Arabidopsis
Source: PubMed Central journal article supplement — Plant Commun. 2020 Feb 19;1(2):100033. doi: 10.1016/j.xplc.2020.100033 (PMC7748013; doi:10.1016/j.xplc.2020.100033), 2020-02-19
Supplement: mmc1.pdf [file mmc1.pdf]

## Supplemental Information

### **Nucleoporin 160 Regulates Flowering through Anchoring HOS1 for Destabilizing CO in *Arabidopsis***

Chunying Li<sup>1,2,3</sup>, Lu Liu<sup>2,3</sup>, Zhi Wei Norman Teo<sup>1,2</sup>, Lisha Shen<sup>2</sup> & Hao Yu<sup>1,2,\*</sup>

<sup>1</sup>Department of Biological Sciences, Faculty of Science, National University of Singapore, Singapore 117543, Singapore.

<sup>2</sup>Temasek Life Sciences Laboratory, National University of Singapore, Singapore 117604, Singapore.

<sup>3</sup>These authors contributed equally to this article.

\*Correspondence: Hao Yu (dbsyuhao@nus.edu.sg)

#### **This PDF file includes:**

Supplemental Figures 1-11

Supplemental Table 1

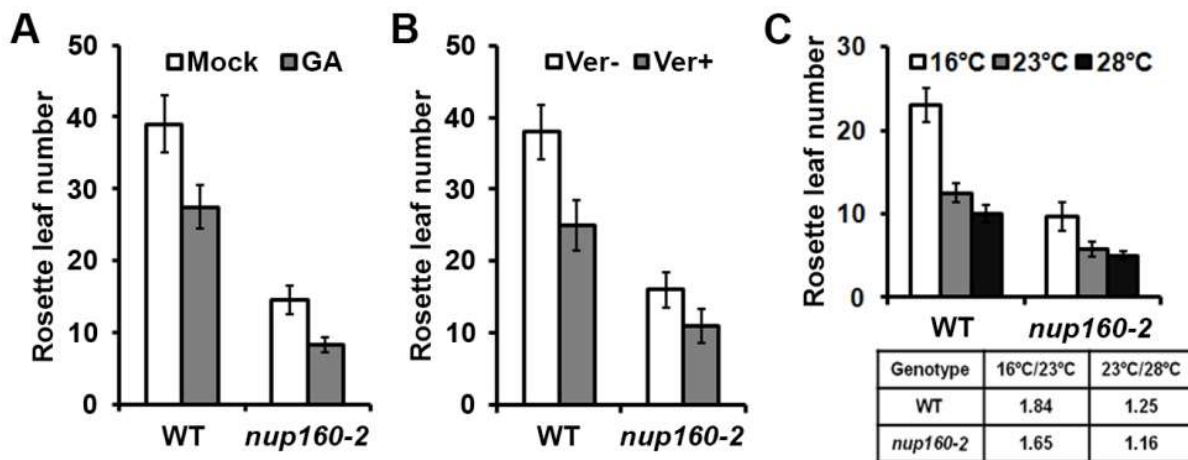

**Supplemental Figure 1. Effects of *Nup160* on the Flowering Response to GA, Vernalization, and Ambient Temperature.**

**(A)** Flowering time of wild-type (WT) and *nup160-2* in response to GA treatment under short days. Exogenous GA (100  $\mu$ M) or mock treatment was applied weekly after germination ( $n \geq 16$ ,  $\pm$  SD).

**(B)** Flowering time of wild-type (WT) and *nup160-2* in response to vernalization. Seeds were germinated on MS medium and vernalized at 4°C under low light conditions for 6 weeks and then transferred to soil to grow under short days ( $n \geq 20$ ,  $\pm$  SD).

**(C)** Flowering time of wild-type (WT) and *nup160-2* in response to changes in ambient temperature (16°C, 23°C, and 28°C) under long days. The ratios of flowering time between 16°C and 23°C (16°C/23°C) and between 23°C and 28°C (23°C/28°C) for wild type and *nup160-2* are shown in the table ( $n \geq 16$ ,  $\pm$  SD).

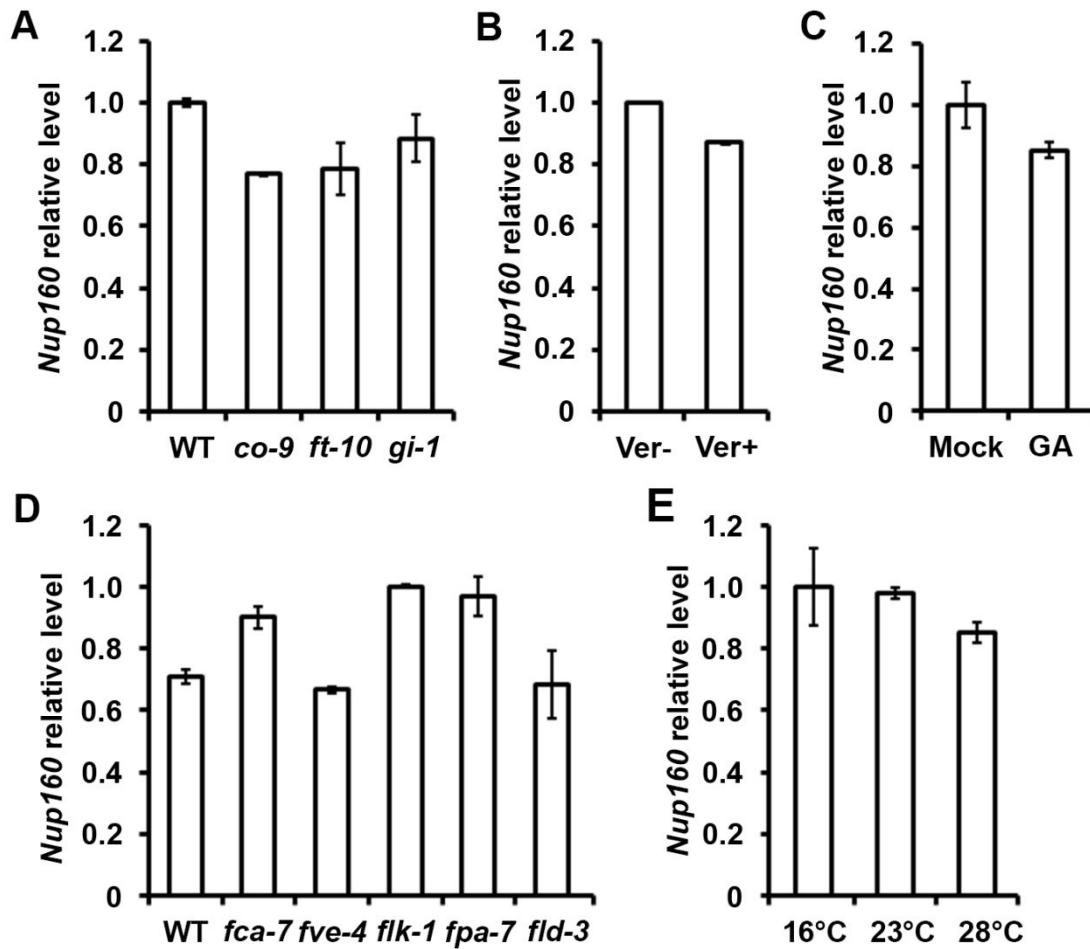

**Supplemental Figure 2. Effects of Various Flowering Pathways on *Nup160* Expression.**

(A) *Nup160* expression in 9-day-old seedlings of photoperiod pathway mutants grown under long days.

(B) Expression of *Nup160* in response to vernalization. Seeds were germinated on MS medium and vernalized at 4°C under low light conditions for 6 weeks before being transferred to soil to grow under long days ( $n \geq 20$ ,  $\pm$  SD). 9-day-old seedlings were harvested for expression analysis.

(C) Expression of *Nup160* in 9-day-old wild-type seedlings in response to GA treatment. Samples were harvested 6 h after GA or mock treatment.

(D) *Nup160* expression in 9-day-old seedlings of autonomous pathway mutants grown under long days.

(E) Effects of ambient temperature on *Nup160* expression. 9-day-old wild-type seedlings grown at 16°C, 23°C, and 28°C under long days were harvested for expressions analysis. Gene expression levels in all panels were normalized against the expression of *TUB2* and shown as relative values to the highest level in each panel as 1. Error bars indicate SD.

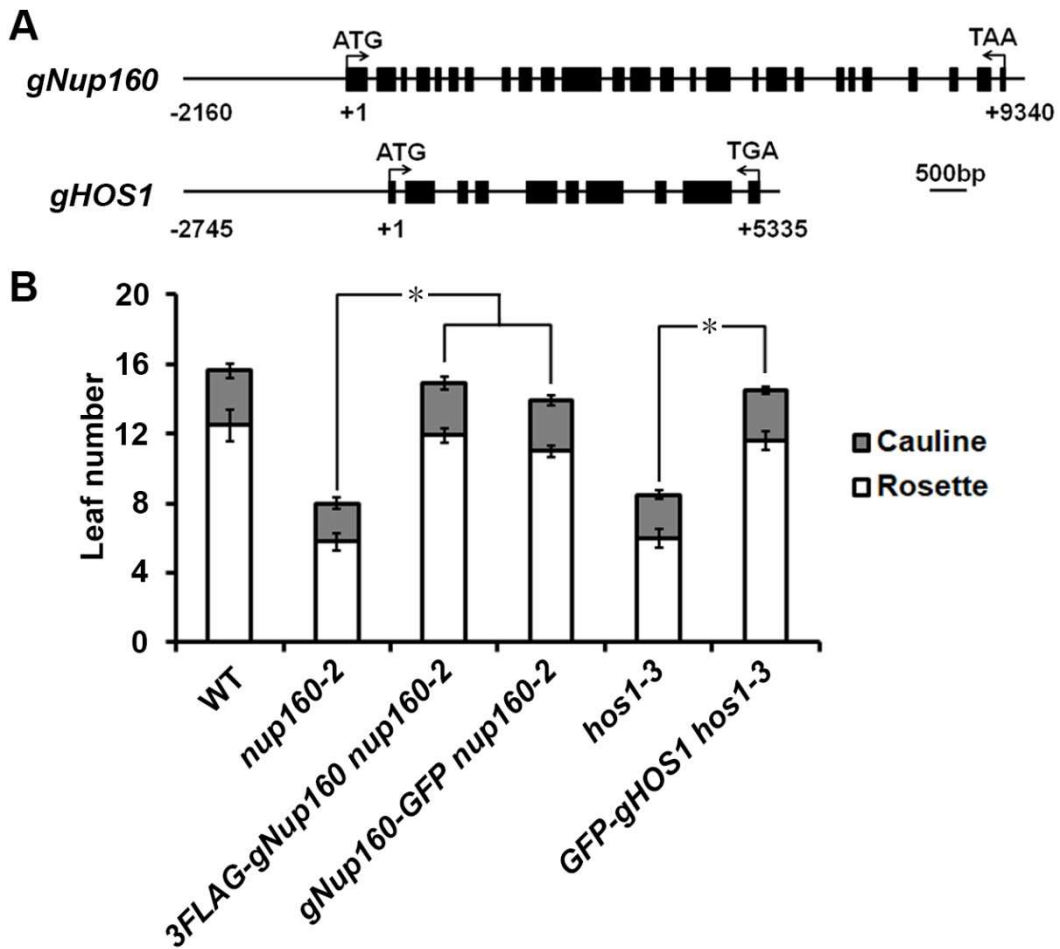

**Supplemental Figure 3. Rescue of *nup160-2* and *hos1-3* Mutants by Various Gene-Tagging Lines.**

(A) Schematic diagrams showing the *Nup160* and *HOS1* genomic fragments used for complementation experiments. Exons are represented by black boxes.

(B) Flowering time of wild-type, *nup160-2* and *hos1-3* as well as their rescued lines grown under long days ( $n \geq 16$ ,  $\pm$  SD). Asterisks indicate statistically significant differences in flowering time between specified genotypes (two-tailed paired Student's *t* test,  $P < 0.005$ ).

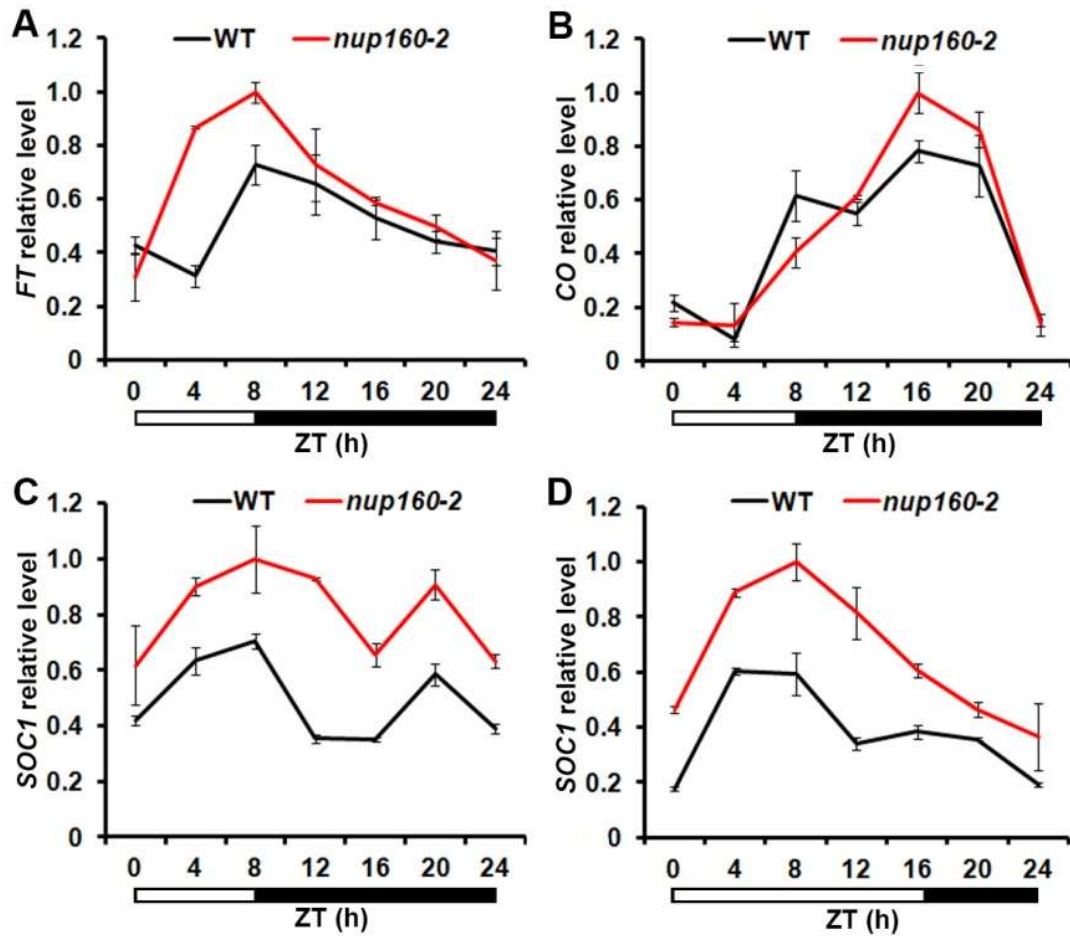

**Supplemental Figure 4. Diurnal Expression of *FT*, *SOC1*, and *CO* in Wild-Type and *nup160-2* Plants under Short Days or Long Days.**

(A-C) Diurnal expression of *FT* (A), *CO* (B), and *SOC1* (C) in 2-week-old wild-type and *nup160-2* seedlings grown under short days.

(D) Diurnal expression of *SOC1* in 9-day-old wild-type and *nup160-2* seedlings grown under long days. Gene expression levels were normalized against the expression of *TUB2* and shown as relative values to the highest level in each panel as 1.0. Error bars indicate SD.

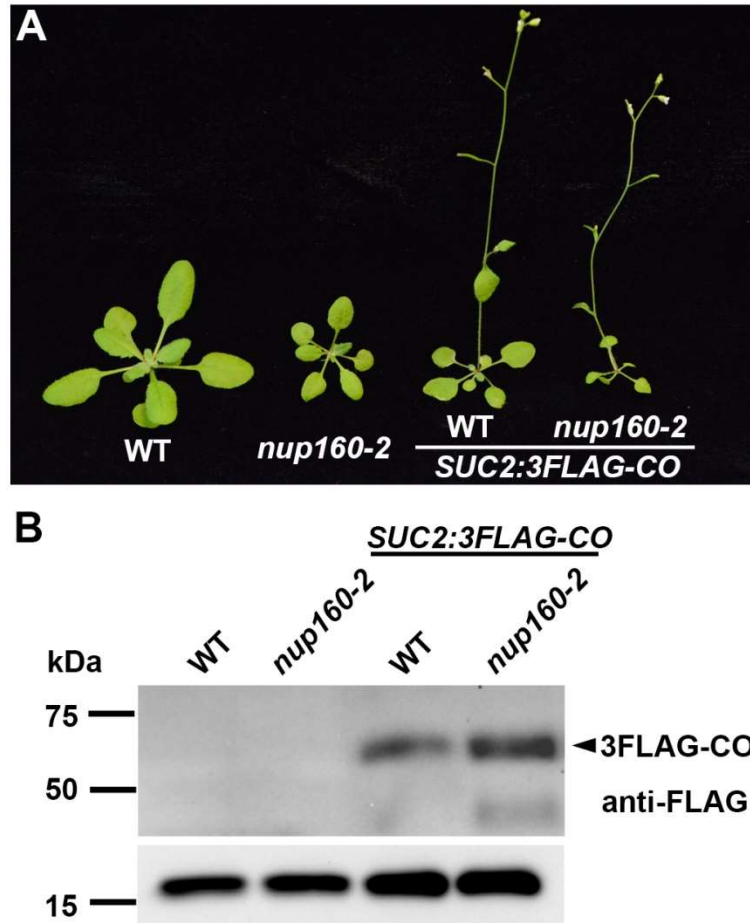

**Supplemental Figure 5. Characterization of *SUC2:3FLAG-CO* in Wild-Type and *nup160-2* Backgrounds.**

**(A)** Flowering phenotype of wild-type, *nup160-2*, *SUC2:3FLAG-CO*, and *SUC2:3FLAG-CO nup160-2* plants grown under long days.

**(B)** Immunoblot analysis of nuclear protein extracts using anti-FLAG antibody shows detection of 3FLAG-CO in *SUC2:3FLAG-CO* and *SUC2:3FLAG-CO nup160-2*, but not in wild-type and *nup160-2* seedlings (upper panel). 9-day-old seedlings grown under long days were collected at ZT4. Histone H3 is shown as a loading control (lower panel).

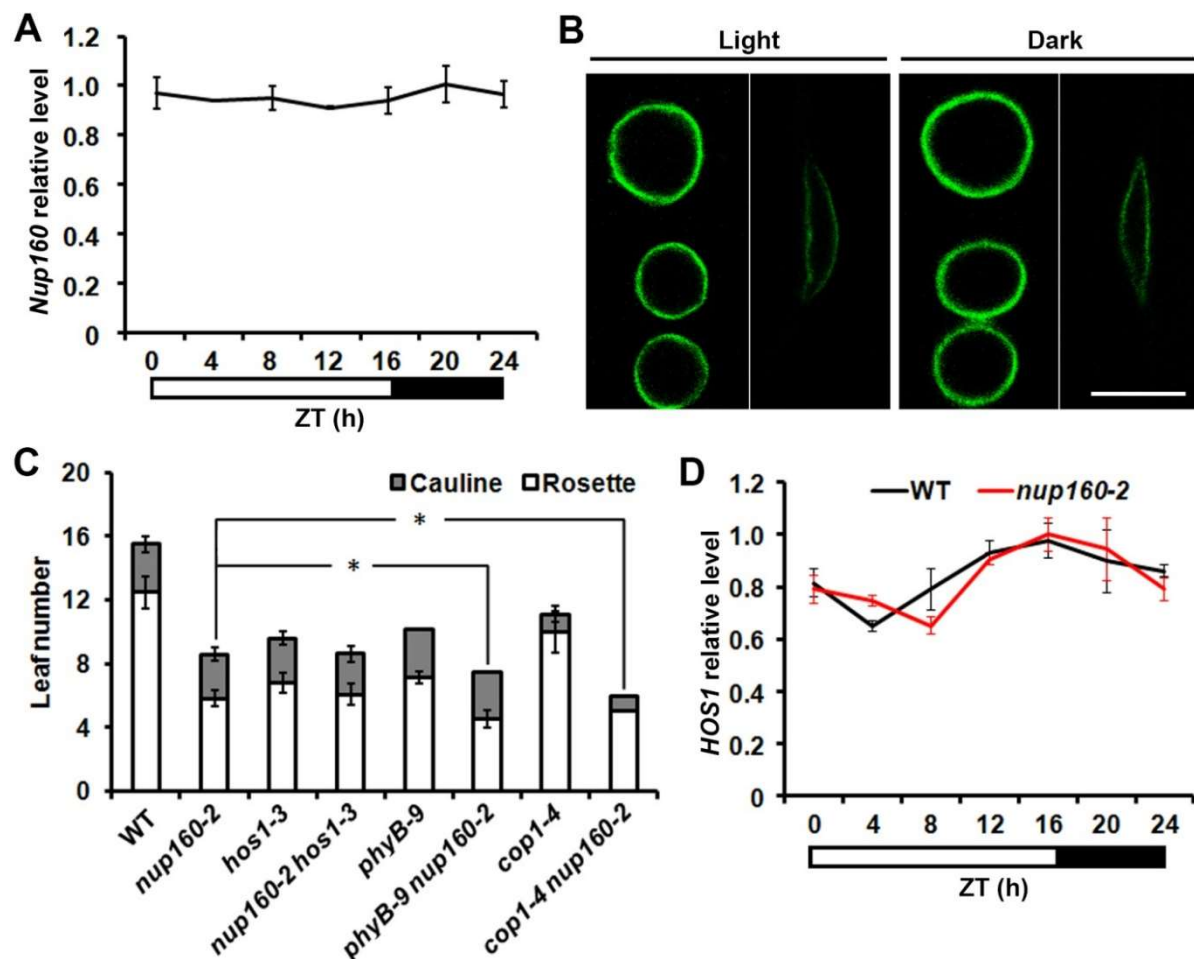

**Supplemental Figure 6. Characterization of Genetic or Molecular Interaction between *Nup160* and Regulators of *CO*.**

(A) Diurnal expression of *Nup160* in 9-day-old wild-type seedlings grown under long days. Samples were harvested every 4 hours from the onset of illumination, which are shown in hours as Zeitgeber time (ZT). Gene expression levels were normalized against the expression of *TUB2* and shown as relative values to the highest level as 1.0. Error bars indicates SD.

(B) Subcellular localization of Nup160-GFP detected in meristematic root cells (left) and mature root cells (right) of 5-day-old seedlings grown under continuous light or transferred to dark for 4 hours. Scale bar corresponds to 10  $\mu$ m.

(C) Flowering time of various mutants grown under long days. Asterisks indicate statistically significant differences in flowering time between specified genotypes (two-tailed paired Student's *t* test,  $P < 0.005$ ) ( $n \geq 16$ ,  $\pm$  SD).

(D) Diurnal expression of *HOS1* in 9-day-old wild-type and *nup160-2* seedlings grown under long days. Gene expression levels were normalized against the expression of *TUB2* and shown as relative values to the highest level as 1.0. Error bars indicate SD.

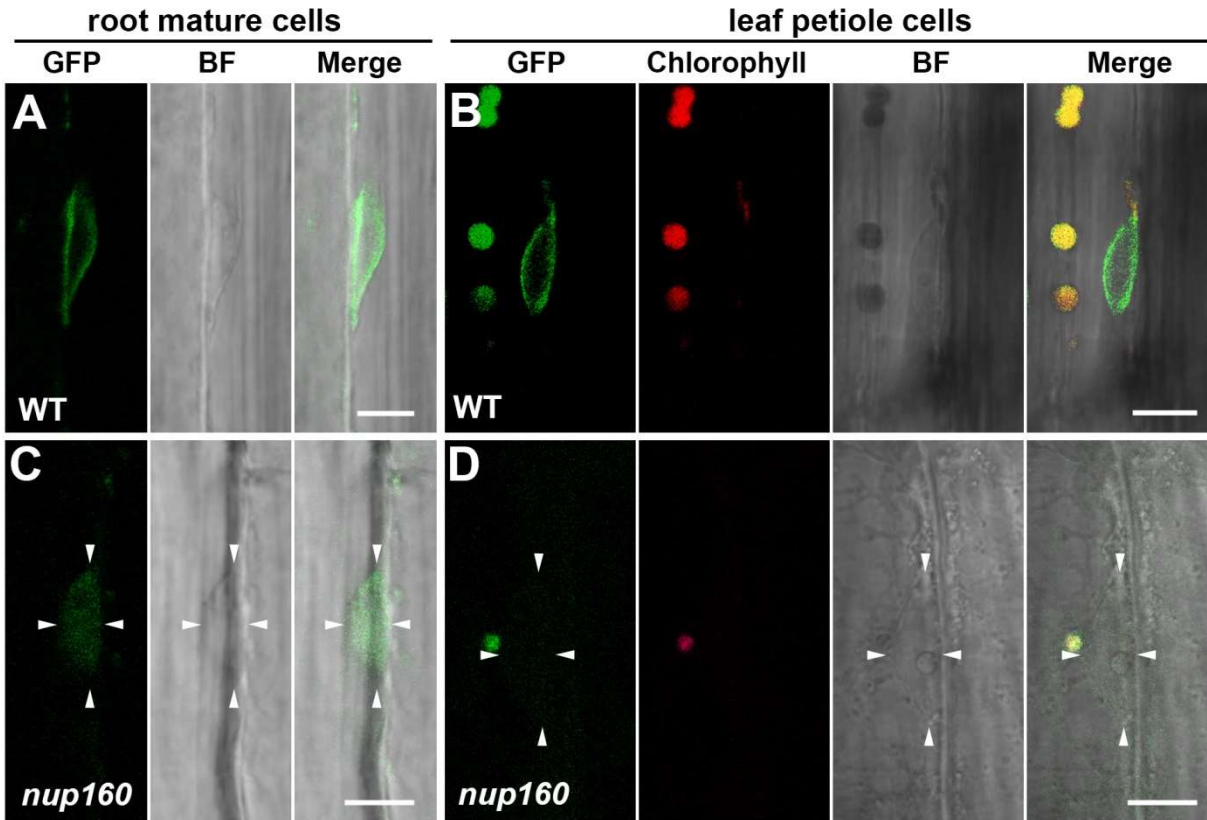

**Supplemental Figure 7. Nup160 Affects NPC-Localization of HOS1.**

(A and B) Subcellular localization of GFP-HOS1 in a mature root cell (A) and a leaf petiole cell (B) of *GFP-gHOS1 hos1-3* in the wild-type (WT) background. Scale bars correspond to 10  $\mu$ m. (C and D) Subcellular localization of GFP-HOS1 in a mature root cell (C) and a leaf petiole cell (D) of *GFP-gHOS1 hos1-3* in the *nup160-2* background. Arrowheads outline the nucleus localization observed in the *nup160-2* background. GFP, GFP fluorescence; BF, bright field; Chlorophyll, autofluorescence of chlorophyll; Merge, merge of GFP and BF with/without Chlorophyll images. Scale bars correspond to 10  $\mu$ m.



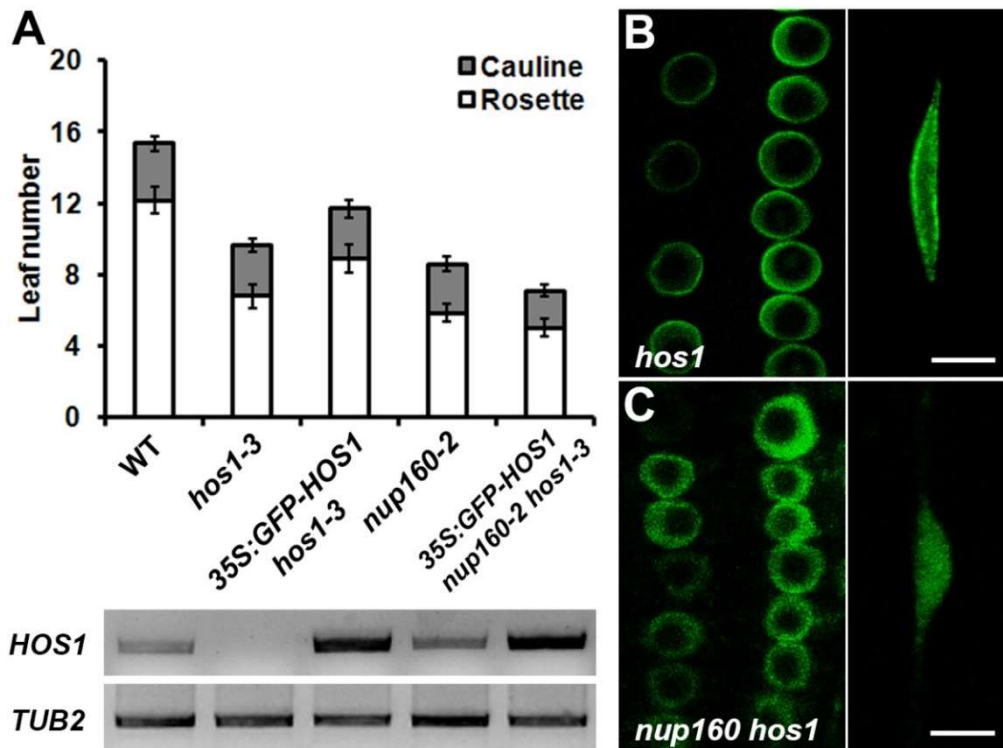

**Supplemental Figure 8. Nup160 Affects NPC-Localization of HOS1 When *HOS1* Is Overexpressed.**

**(A)** Flowering time (upper panel;  $n \geq 16$ ,  $\pm$  SD) and *HOS1* expression (lower panel) in wild-type, *hos1-3*, *35S:GFP-HOS1 hos1-3*, *nup160-2*, and *35S:GFP-HOS1 nup160-2 hos1-3* seedlings grown under long days. 9-day-old seedlings were collected for semi-quantitative PCR analysis. *TUB2* was amplified as an internal control.

**(B and C)** Subcellular localization of GFP-HOS1 in meristematic root cells (left panels) and mature root cells (right panels) of 5-day-old *35S:GFP-HOS1 hos1-3* (**B**) and *35S:GFP-HOS1 nup160-2 hos1-3* (**C**) plants. Scale bars correspond to 10  $\mu$ m.

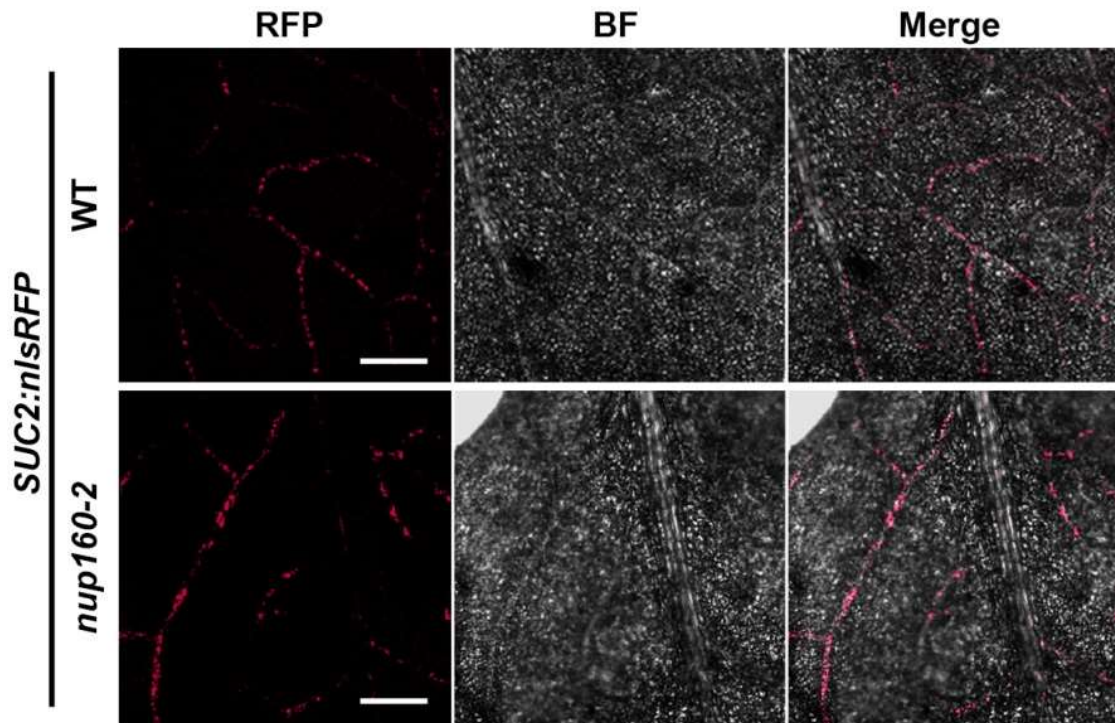

**Supplemental Figure 9. Detection of nlsRFP in Leaf Vasculature Cells of *SUC2:nlsRFP*.** Confocal analysis of nlsRFP expressed in the first true leaf of 9-day-old *SUC2:nlsRFP GFP-gHOS1 hos1-3* (indicated as WT; upper panel) and *SUC2:nlsRFP GFP-gHOS1 nup160-2 hos1-3* (indicated as *nup160-2*; lower panel). RFP, RFP fluorescence; BF, bright field; Merge, merge of RFP and BF images. Scale bars correspond to 200  $\mu$ m.

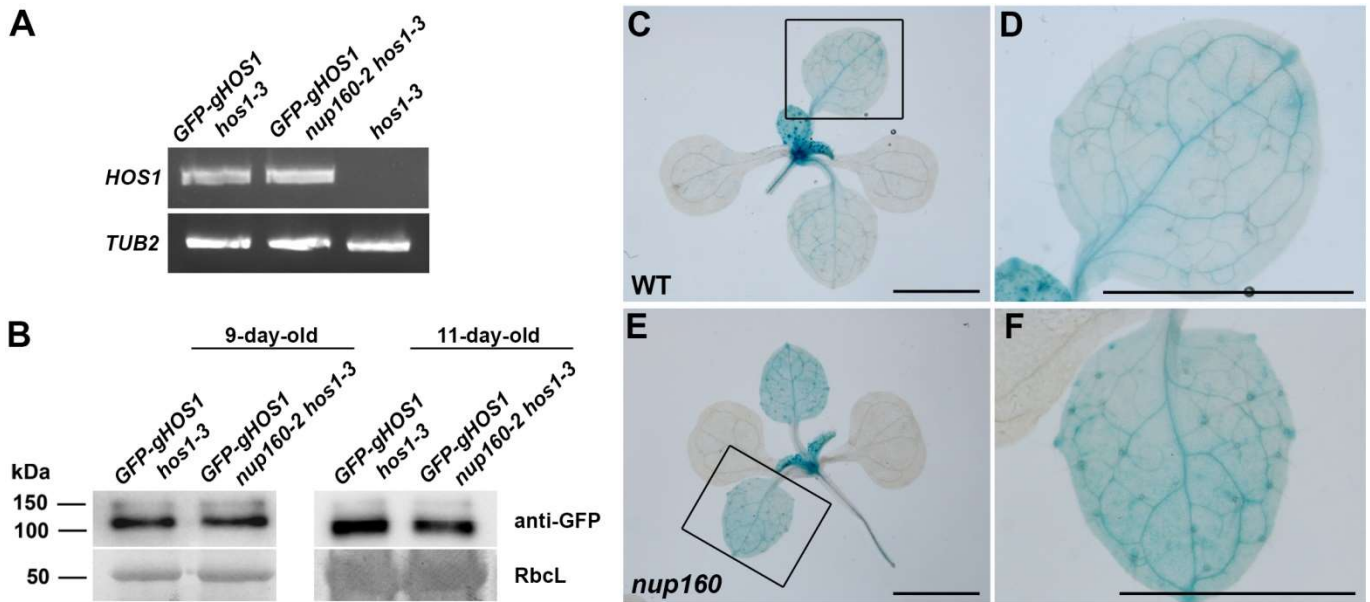

### Supplemental Figure 10. NUP160 Does Not Affect *GFP-HOS1* mRNA and Protein Expression.

(A) Semi-quantitative PCR shows comparable *GFP-HOS1* mRNA expression in 9-day-old *GFP-gHOS1 hos1-3* and *GFP-gHOS1 nup160-2 hos1-3* seedlings. The fragment covering a 500-bp *HOS1* coding region was amplified, while *TUB2* was amplified as an internal control.

(B) Immunoblot analysis shows comparable GFP-HOS1 protein expression in *GFP-gHOS1 hos1-3* and *GFP-gHOS1 nup160-2 hos1-3*. Total protein was extracted from 9 and 11-day-old seedlings and analyzed using anti-GFP antibody. The membrane stained with Ponceau Red showing the ribulose biphosphate carboxylase large subunit (RbcL) was included as a loading control.

(C-F) *HOS1-GUS* expression in 9-day-old *gHOS1-GUS* in the wild-type (WT) (C and D) and *nup160-2* (E and F) backgrounds. (D and F) High-magnification images of the black squares shown in (C and E), respectively. Scale bars correspond to 1 mm (C-F).

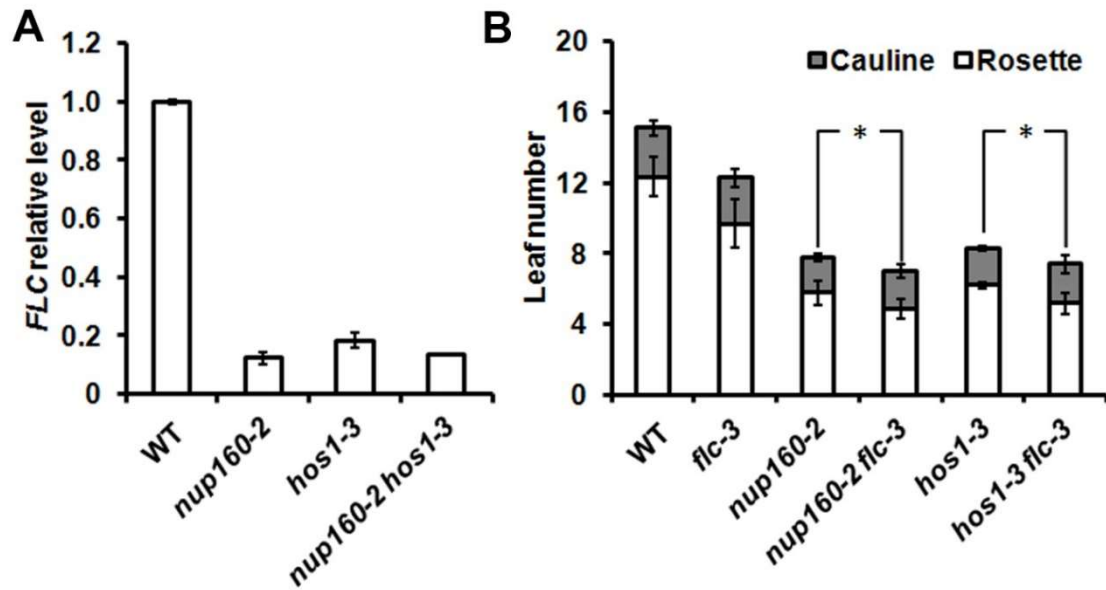

**Supplemental Figure 11. Nup160 and HOS1 Similarly Affect *FLC* Expression.**

(A) *FLC* expression in 9-day-old of wild-type (WT), *nup160-2*, *hos1-3*, and *nup160-2 hos1-3* seedlings grown under long days. Gene expression levels were normalized against the expression of *TUB2* and shown as relative values to the highest level as 1. Error bars indicate SD.

(B) Flowering time of various mutants grown under long days ( $n \geq 16$ ,  $\pm$  SD). Asterisks indicate statistically significant differences in flowering time between specified genotypes (two-tailed paired Student's *t* test,  $P < 0.05$ ).

**Supplemental Table 1. List of Primers Used in This Study.**

**Primers for Plasmid Construction**

| <b>Construct</b>     | <b>Primer Name</b> | <b>Sequence (5'-3')</b>                           |
|----------------------|--------------------|---------------------------------------------------|
| <i>miR-Nup160</i>    | 1-AmiR-Nup160-s    | GATTGATACATGTAACCTGGCGCTCTCTCT<br>TTTGTATTCC      |
|                      | 2-AmiR-Nup160-a    | GAGCGCCAAGTTACATGTATCAATCAAAG<br>AGAATCAATGA      |
|                      | 3-AmiR-Nup160-*s   | GAGCACCAAGTTACAAGTATCATTACACAG<br>GTCGTGATATG     |
|                      | 4-AmiR-Nup160-*a   | GAATGATACTTGTAACCTGGTGCTCTACAT<br>ATATATTCTT      |
| <i>gNup160</i>       | gNup160-F          | CACCTGATTGTAACCTAACACATGACCAC                     |
|                      | gNup160-R          | TGTTACTTCTTCTTCTCACACGCAC                         |
| <i>3FLAG-gNup160</i> | 3FLAG-gNup160-F    | GGTTTAGGGTTCAAAGAAGAAATGGATTA<br>CAAGGATCATGATGGA |
|                      | 3FLAG-gNup160-R    | ATCCGACGATTCTCCTCCTTATCGTCATCA<br>TCTTTGTAATC     |
| <i>gNup160-KpnI</i>  | gNup160-KpnI-F     | CCTCTGCAACCGGTGGTACCAGAAAGTCT<br>TGATTGTTCCGTG    |
|                      | gNup160-KpnI-R     | CAATCAAGACTTTCTGGTACCACCGGTTG<br>CAGAGGATACAG     |
| <i>gHOS1</i>         | gHOS1-F            | CACCTGGTGTGACCGTCTCATGGAGA                        |
|                      | gHOS1-R            | GTGACGGAACGATAGGAAGAGAC                           |
| <i>gHOS1-KpnI</i>    | gHOS1-KpnI-F       | AGCAAGAGGTACCTGAAATGAAACAAAC<br>ACTCGAAAAGAC      |
|                      | gHOS1-KpnI-R       | TTCATTTTCAGGTACCTCTTGCTGCGAATCT<br>ACGTCTC        |
| <i>GUS-gHOS1</i>     | GUS(N)-KpnI-F      | CGGGGTACCATGTTACGTCCTGTAGAAAC<br>C                |
|                      | GUS(N)-KpnI-R      | CGGGGTACCTCCACCTCCTTGTTCCTCC<br>CTGCTGCG          |
| <i>GFP-gHOS1</i>     | GFP-F-KpnI         | CGGGGTACCATGAGTAAAGGAGAAGAAGT<br>TTTCAC           |
|                      | GFP(N)-R-KpnI      | CGGGGTACCTCCACCTCCTTGTATAGTTC<br>ATCCATG          |
| <i>gNup160-GUS</i>   | GUS(C)-KpnI-F      | CGGGGTACCGGAGGTGGAATGTTACGTCC<br>TGTAGAAACC       |
|                      | GUS(C)-KpnI-R      | CGGGGTACCCTATTGTTTGCCTCCCTGCTG<br>CG              |
| <i>35S:GFP-HOS1</i>  | GFP-F-XhoI         | CCGCTCGAGATGAGTAAAGGAGAAGAAGT<br>TTTCAC           |
|                      | GFP-R-XhoI         | CCGCTCGAGTTTGTATAGTTCATCCATGC                     |
|                      | HOS1-F-XmaI        | CCCCCGGGATGGATACGAGAGAAATCAA<br>CGGT              |

|                      |                 |                                                                                                                             |
|----------------------|-----------------|-----------------------------------------------------------------------------------------------------------------------------|
|                      | HOS1-R-XmaI     | CCCCCGGGTCATCTTGCTGCGAATCTACG                                                                                               |
| <i>SUC2:3FLAG-CO</i> | 3FLAG-CO-F-XmaI | CCCCGGGATGGATCCCCGGGATGGATTAC<br>AAGGATCATGATGGAGACTACAAGGATCA<br>TGATATTGATTACAAAGATGATGACGATAA<br>GTTGAAACAAGAGAGTAACGACA |
|                      | CO-R-XmaI       | CCCCGGGTCAGAATGAAGGAACAATCCCA                                                                                               |
| <i>gNup160-cEYFP</i> | cEYFP-F-KpnI    | CGGGGTACCGGCAGCGTGCAGCTCGCC                                                                                                 |
|                      | cEYFP-R-KpnI    | CGGGGTACCTCACTTGTACAGCTCGTCCA                                                                                               |
| <i>nEYFP-gHOS1</i>   | nEYFP-F-KpnI    | CGGGGTACCATGGTGAGCAAGGGCGAGG<br>A                                                                                           |
|                      | nEYFP-R-KpnI    | CGGGGTACCGTCCTCGATGTTGTGGCGGA                                                                                               |
| <i>SUC2:nlsRFP</i>   | nlsRFP-F-XmaI   | CCCCGGGATGCCAAAGAAAAAGAGGAAA<br>GTGCCTAAGAAGAAGAGAAAGGTTGCGA<br>AGGCAGATAAGAAAC                                             |
|                      | RFP-R-XbaI      | GCTCTAGACTAGGCGCCGGTGGAGTGGC                                                                                                |

### Primers for Quantitative Real-Time PCR

| Primer Name | Sequence (5'-3')            |
|-------------|-----------------------------|
| TUB2-F      | GAGAATGCTGATGAGTGCATGG      |
| TUB2-R      | AGAGTTGAGTTGACCAGGGAACC     |
| Nup160-F    | AAAGGAACTCTGTGGTCATCGC      |
| Nup160-R    | TGATCAGCAGGGCTTCTATCAGG     |
| FT-F        | CTTGGCAGGCAAACAGTGTATGCAC   |
| FT-R        | GCCACTCTCCCTCTGACAATTGTAGA  |
| CO-F        | TCAGGGACTCACTACAACGACAATGG  |
| CO-R        | TTGGGTGTGAAGCTGTTGTGACACAT  |
| SOC1-F      | AGCTGCAGAAAACGAGAAGCTCTCTG  |
| SOC1-R      | GGGCTACTCTTTCATCACCTCTTCC   |
| HOS1-F      | GTCATTGCTTTCTTGCTGGA        |
| HOS1-R      | TCTAACCACGCTTGCATCTC        |
| FLC-F       | CTAGCCAGATGGAGAATAATCATCATG |
| FLC-R       | TTAAGGTGGCTAATTAAGTAGTGGGAG |

### Primers for Semi-Quantitative PCR

| Primer Name   | Sequence (5'-3')            |
|---------------|-----------------------------|
| TUB2-semi-F   | ATCCGTGAAGAGTACCCAGAT       |
| TUB2-semi-R   | TCACCTTCTTCATCCGCAGTT       |
| Nup160-semi-F | ATGGAGGAGAATCGTCGGAATC      |
| Nup160-semi-R | GTCGAACATCCAAGTGAATCAAATGAT |
| HOS1-semi-F   | CATAATGGTCTGGTGCATCAGA      |
| HOS1-semi-R   | AATCCTACAAGCTTCCTGGAGTG     |
